# Supplementary material for: Shared genetics and bidirectional causal relationships between type 2 diabetes and attention-deficit/hyperactivity disorder
Source: HighWire-hosted journal article supplement (doi:10.1136/gpsych-2022-100996), 2023-03-01
Supplement: gpsych-2022-100996supp001_data_supplement.pdf [file gpsych-2022-100996supp001_data_supplement.pdf]

**Supplementary Table 1. Mendelian randomization sensitivity analysis**

| Exposure | Outcome  | Method   | Q        | Q_P      | I2     | Egger_intercept | P_pleiotropy |
|----------|----------|----------|----------|----------|--------|-----------------|--------------|
| ADHD2019 | T2D      | IVW      | 6.68     | 0.67     | -0.347 | NA              | NA           |
| ADHD2019 | T2D      | WM       | NA       | NA       | NA     | NA              | NA           |
| ADHD2019 | T2D      | MR Egger | 6.11     | 0.635    | -0.473 | -0.008          | 0.472        |
| ADHD2022 | T2D      | IVW      | 1.16E+02 | 1.22E-13 | 0.784  | NA              | NA           |
| ADHD2022 | T2D      | WM       | NA       | NA       | NA     | NA              | NA           |
| ADHD2022 | T2D      | MR Egger | 1.11E+02 | 3.64E-13 | 0.775  | 0.011           | 0.324        |
| T2D      | ADHD2019 | IVW      | 2.95E+02 | 3.42E-06 | 0.345  | NA              | NA           |
| T2D      | ADHD2019 | WM       | NA       | NA       | NA     | NA              | NA           |
| T2D      | ADHD2019 | MR Egger | 2.94E+02 | 2.96E-06 | 0.344  | 0.001           | 0.594        |
| T2D      | ADHD2022 | IVW      | 3.94E+02 | 7.01E-16 | 0.51   | NA              | NA           |
| T2D      | ADHD2022 | WM       | NA       | NA       | NA     | NA              | NA           |
| T2D      | ADHD2022 | MR Egger | 3.92E+02 | 8.74E-16 | 0.507  | 0.001           | 0.295        |

ADHD: attention-deficit/hyperactivity disorder; T2D: type 2 diabetes; IVW: inverse variance weighted; MR: Mendelian randomization; WM: weighted median; Q: statistics of heterogeneity analysis; Q\_P: P value of heterogeneity analysis; I2: I2 statistics of heterogeneity; Egger\_intercept: intercept of MR-Egger intercept analysis; P\_pleiotropy: P value of MR-Egger intercept analysis.
